# Supplementary material for: Real-Time Packing Behavior of Core-Shell Silica@Poly(N-isopropylacrylamide) Microspheres as Photonic Crystals for Visualizing in Thermal Sensing
Source: Polymers (Basel). 2016 Dec 10;8(12):428. doi: 10.3390/polym8120428 (PMC6431998; doi:10.3390/polym8120428)
Supplement: Supplementary file 1 [file polymers-08-00428-s001.pdf]

# Supplementary Materials: Real-time Packing Behavior of Core-Shell Silica@Poly(*N*-isopropylacrylamide) Microspheres as Photonic Crystals for Visualizing in Thermal Sensing

Karthikeyan Manivannan, Yi-Shen Huang, Bohr-Ran Huang, Chih-Feng Huang \*, and Jem-Kun Chen \*

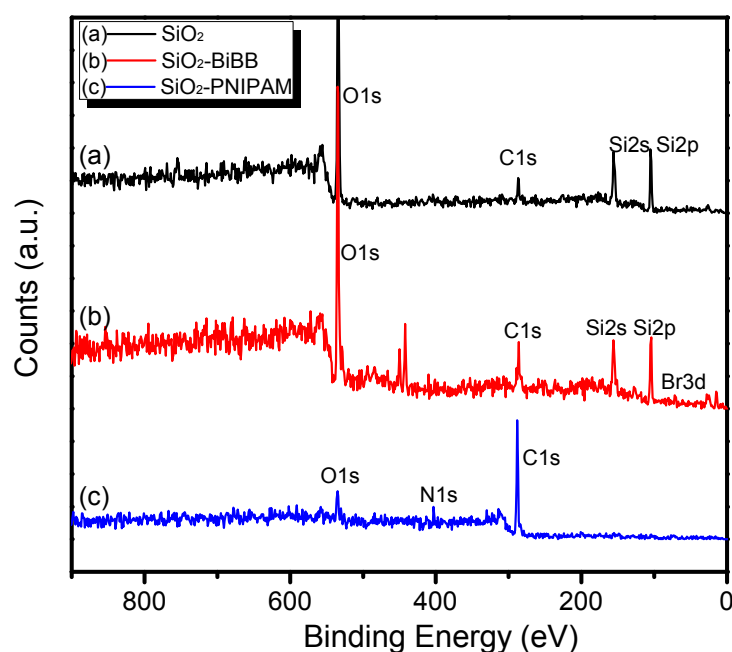

**Figure S1.** XPS spectra of (a) bare silica particles; (b) BiBB-functionalized silica particles, and (c) PNIPAM-grafted silica particles.

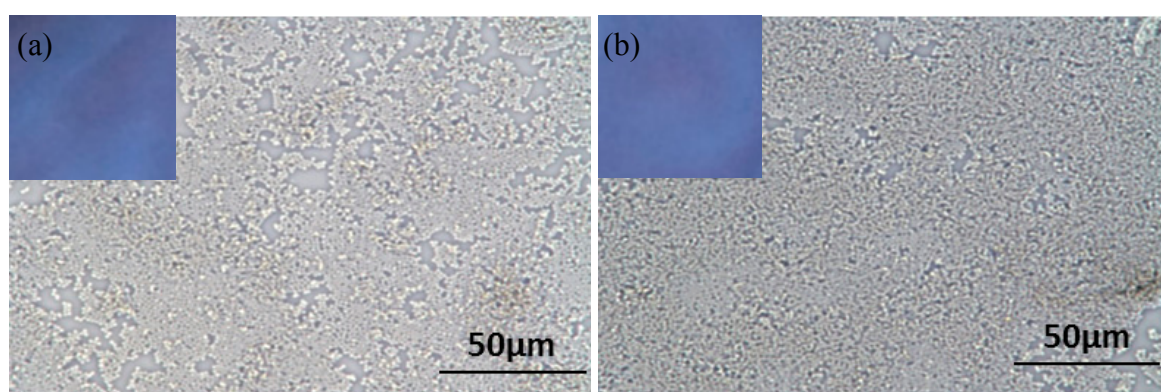

**Figure S2.** Control experiment: OM images of bare silica microsphere (a) below and (b) above the LCST of PNIPAM.
